# Supplementary material
Source: PubMed Central journal article supplement (PMC3457580)
Supplement: IAI.00104-12_zii999099805so1.pdf [file IAI.00104-12_zii999099805so1.pdf]

**Supplemental table. List of surface-exposed proteins as predicted by *in silico* analysis.**

| <b>Locus Name</b> | <b>Putative product name</b>                                         | <b>Protein size (amino acid)</b> | <b>Motif</b> | <b>No. of antigenic determinants</b> |
|-------------------|----------------------------------------------------------------------|----------------------------------|--------------|--------------------------------------|
| <b>SE2395</b>     | Ser-Asp rich fibrinogen-binding, bone sialoprotein-binding protein   | 1633                             | LPXTG        | 50                                   |
| <b>SE0175</b>     | accumulation-associated protein                                      | 1469                             | LPXTG        | 35                                   |
| <b>SE0331</b>     | Ser-Asp rich fibrinogen-binding, bone sialoprotein-binding protein   | 1056                             | LPXTG        | 29                                   |
| <b>SE1500</b>     | hypothetical protein                                                 | 1012                             | LPXTG        | 40                                   |
| <b>SE0828</b>     | lipoprotein VsaC                                                     | 827                              | LPXTG        | 31                                   |
| <b>SE1238</b>     | penicillin-binding protein 3                                         | 696                              | PBD          | 21                                   |
| <b>SE2232</b>     | conserved hypothetical protein                                       | 676                              | LPXTG        | 20                                   |
| <b>SE1106</b>     | ABC transporter _membrane spanning protein                           | 564                              | Lipobox      | 16                                   |
| <b>SE0684</b>     | peptide binding protein OppA                                         | 547                              | Lipobox      | 19                                   |
| <b>SE1981</b>     | nickel ABC transporter nickel-binding protein                        | 491                              | Lipobox      | 18                                   |
| <b>SE1511</b>     | protoporphyrinogen oxidase                                           | 482                              | PBD          | 22                                   |
| <b>SE1501</b>     | hypothetical protein                                                 | 415                              | LPXTG        | 11                                   |
| <b>SE1588</b>     | conserved hypothetical protein                                       | 402                              | Lipobox      | 13                                   |
| <b>SE2212</b>     | conserved hypothetical protein                                       | 388                              | Lipobox      | 16                                   |
| <b>SE0800</b>     | potD protein                                                         | 357                              | Lipobox      | 12                                   |
| <b>SE1628</b>     | hypothetical protein                                                 | 357                              | LPXTG        | 8                                    |
| <b>SE0424</b>     | lipase LipA                                                          | 349                              | PBD          | 12                                   |
| <b>SE0518</b>     | ferrichrome ABC transporter                                          | 347                              | Lipobox      | 12                                   |
| <b>SE1768</b>     | ferrichrome ABC transporter                                          | 334                              | Lipobox      | 10                                   |
| <b>SE0193</b>     | Zn-binding lipoprotein adcA                                          | 331                              | Lipobox      | 11                                   |
| <b>SE1521</b>     | prsA                                                                 | 325                              | Lipobox      | 10                                   |
| <b>SE1070</b>     | thioredoxine reductase                                               | 325                              | Lipobox      | 9                                    |
| <b>SE0167</b>     | periplasmic-iron-binding protein BitC                                | 324                              | Lipobox      | 14                                   |
| <b>SE2319</b>     | autolysin _N-acetylmuramoyl-L-alanine amidase                        | 324                              | PBD          | 10                                   |
| <b>SE0224</b>     | glycine betaine_carnitine_choline ABC transporter _osmoprotec_ opuCC | 319                              | Lipobox      | 12                                   |
| <b>SE0391</b>     | conserved hypothetical protein                                       | 317                              | Lipobox      | 12                                   |
| <b>SE0405</b>     | lipoprotein                                                          | 309                              | Lipobox      | 10                                   |
| <b>SE2157</b>     | conserved hypothetical protein                                       | 307                              | Lipobox      | 13                                   |
| <b>SE2222</b>     | conserved hypothetical protein                                       | 304                              | Lipobox      | 11                                   |
| <b>SE2223</b>     | conserved hypothetical protein                                       | 300                              | Lipobox      | 11                                   |
| <b>SE0149</b>     | hypothetical protein                                                 | 300                              | Lipobox      | 9                                    |
| <b>SE0522</b>     | conserved hypothetical protein                                       | 296                              | Lipobox      | 8                                    |
| <b>SE0383</b>     | iron-binding protein                                                 | 295                              | Lipobox      | 9                                    |
| <b>SE1608</b>     | beta-lactamase                                                       | 281                              | Lipobox      | 11                                   |
| <b>SE2320</b>     | lactococcal lipoprotein                                              | 281                              | Lipobox      | 11                                   |
| <b>SE0602</b>     | conserved hypothetical protein                                       | 270                              | Lipobox      | 11                                   |
| <b>SE1920</b>     | conserved hypothetical protein                                       | 267                              | Lipobox      | 9                                    |
| <b>SE0537</b>     | conserved hypothetical protein                                       | 266                              | PBD          | 7                                    |
| <b>SE1993</b>     | ABC transporter _periplasmic amino acid-binding protein_             | 262                              | Lipobox      | 7                                    |
| <b>SE0142</b>     | conserved hypothetical protein                                       | 261                              | Lipobox      | 9                                    |

|               |                                |     |         |   |
|---------------|--------------------------------|-----|---------|---|
| <b>SE1852</b> | modA protein                   | 261 | Lipobox | 8 |
| <b>SE0145</b> | conserved hypothetical protein | 253 | Lipobox | 8 |
| <b>SE1480</b> | sortase                        | 253 | PBD     | 7 |
| <b>SE0144</b> | conserved hypothetical protein | 251 | Lipobox | 7 |
| <b>SE0581</b> | phage-related protein          | 248 | Lipobox | 7 |
| <b>SE0034</b> | conserved hypothetical protein | 227 | Lipobox | 9 |
| <b>SE1947</b> | TpgX protein                   | 215 | Lipobox | 7 |
| <b>SE0790</b> | conserved hypothetical protein | 208 | Lipobox | 7 |
| <b>SE2360</b> | conserved hypothetical protein | 207 | Lipobox | 5 |
| <b>SE2152</b> | hypothetical protein           | 196 | LPXTG   | 7 |
| <b>SE1215</b> | conserved hypothetical protein | 192 | Lipobox | 7 |
| <b>SE2342</b> | conserved hypothetical protein | 184 | Lipobox | 8 |
| <b>SE0569</b> | conserved hypothetical protein | 180 | Lipobox | 6 |
| <b>SE2221</b> | conserved hypothetical protein | 166 | Lipobox | 3 |
| <b>SE0467</b> | conserved hypothetical protein | 156 | Lipobox | 5 |
| <b>SE2029</b> | conserved hypothetical protein | 155 | Lipobox | 5 |
| <b>SE0481</b> | conserved hypothetical protein | 145 | Lipobox | 4 |
| <b>SE0447</b> | conserved hypothetical protein | 140 | Lipobox | 5 |
| <b>SE2399</b> | hypothetical protein           | 133 | Lipobox | 6 |
| <b>SE0186</b> | conserved hypothetical protein | 132 | Lipobox | 4 |
| <b>SE1988</b> | conserved hypothetical protein | 122 | Lipobox | 4 |
| <b>SE0082</b> | conserved hypothetical protein | 117 | Lipobox | 5 |
| <b>SE1963</b> | conserved hypothetical protein | 116 | Lipobox | 4 |
| <b>SE1023</b> | conserved hypothetical protein | 77  | Lipobox | 1 |

---
